# Supplementary material for: Synthesis and antibacterial activity study of anti-biofilm agents based on American oyster defensin analog A4
Source: Royal Society of Chemistry journal article supplement (doi:10.1039/d6ra02550a), 2026-04-27
Supplement: d6ra02550a1.pdf [file d6ra02550a1.pdf]

# Synthesis and Anti-bacterial Activity Study of Anti-Biofilm Agent Based on American Oyster Defensin Analog A4

Xin Zhang ‡, Yu Liu ‡, Zhixing Geng and Ye Guo \*

School of Pharmacy, Baotou Medical College, Baotou 014060, China

## Supporting Information

*Figures S1-S2: The structure and oxidation reaction curve of A4*

*Figures S3-S12: The ESI-MS spectrum of A4 and A4 and A4-derived peptides*

*Figures S13-S15: The HPLC of trypsin stability of A4, D-A4, A4-T3*

### S.1. Structure and reaction curve of A4

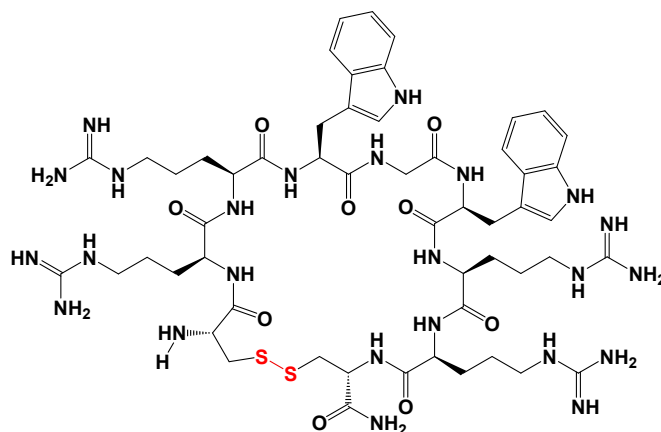

**Figure S1.** The chemical structures of A4

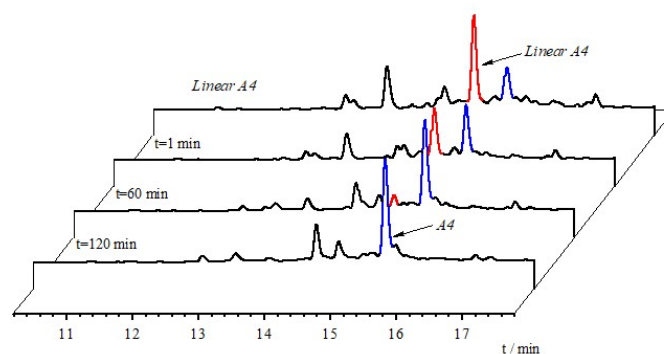

**Figure S2.** Linear A4 Oxidation Reaction

RP-HPLC conditions: a linear gradient of 20%~80% buffer B (0.1% TFA in acetonitrile) in buffer A (0.1% TFA in water) over 30 min (20% for 2 min, then 20%~80% for 30 min) on C18 column,  $\lambda = 214$  nm.

### S.2. Mass spectrum information of A4 and derived peptides

#### S.2.1 Mass spectrum information of A4

For Linear A4, the calculated ESI-MS  $m/z$  values are: 639.765 ( $[M+2H]^{2+}$ ), 426.843 ( $[M+3H]^{3+}$ ), and

320.3825 ( $[M+4H]^{4+}$ ). The observed values are: 639.4916 ( $[M+2H]^{2+}$ ), 426.6697 ( $[M+3H]^{3+}$ ), and 319.8932 ( $[M+4H]^{4+}$ ).

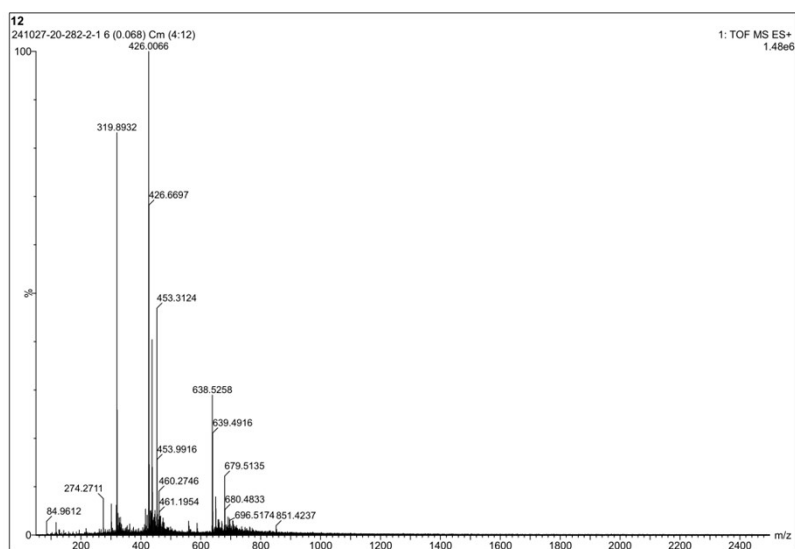

**Figure S3.** The ESI-MS spectrum of Linear A4

For A4, the calculated ESI-MS m/z values are: 638.765 ( $[M+2H]^{2+}$ ), 426.1767 ( $[M+3H]^{3+}$ ), and 319.8825 ( $[M+4H]^{4+}$ ). The observed values are: 638.5186 ( $[M+2H]^{2+}$ ), 426.0170 ( $[M+3H]^{3+}$ ), and 319.8365 ( $[M+4H]^{4+}$ ).

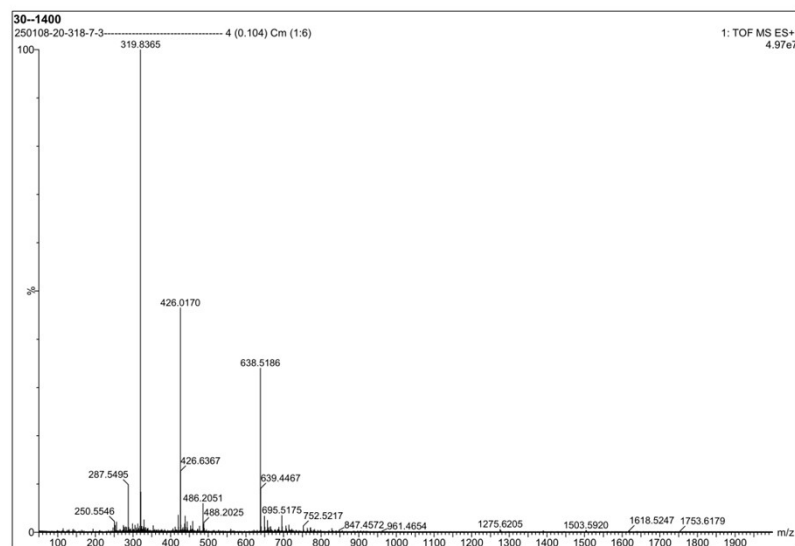

**Figure S4.** The ESI-MS spectrum of A4

### S.2.2 Mass spectrum information of D-A4

For Linear D-A4, the calculated ESI-MS m/z values are: 639.765 ( $[M+2H]^{2+}$ ), 426.843 ( $[M+3H]^{3+}$ ), and 320.3825 ( $[M+4H]^{4+}$ ). The observed values are: 639.4467 ( $[M+2H]^{2+}$ ), 426.6367 ( $[M+3H]^{3+}$ ), and 319.8365 ( $[M+4H]^{4+}$ ).

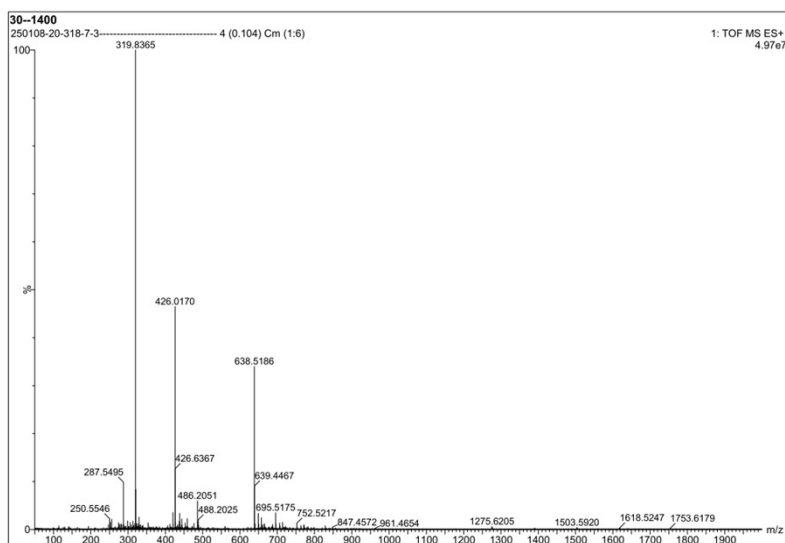

**Figure S5.** The ESI-MS spectrum of Linear D-A4

For D-A4, the calculated ESI-MS  $m/z$  values are: 638.765 ( $[M+2H]^{2+}$ ), 426.1767 ( $[M+3H]^{3+}$ ), and 319.8825 ( $[M+4H]^{4+}$ ). The observed values are: 638.5248 ( $[M+2H]^{2+}$ ), 426.0049 ( $[M+3H]^{3+}$ ), and 319.8321 ( $[M+4H]^{4+}$ ).

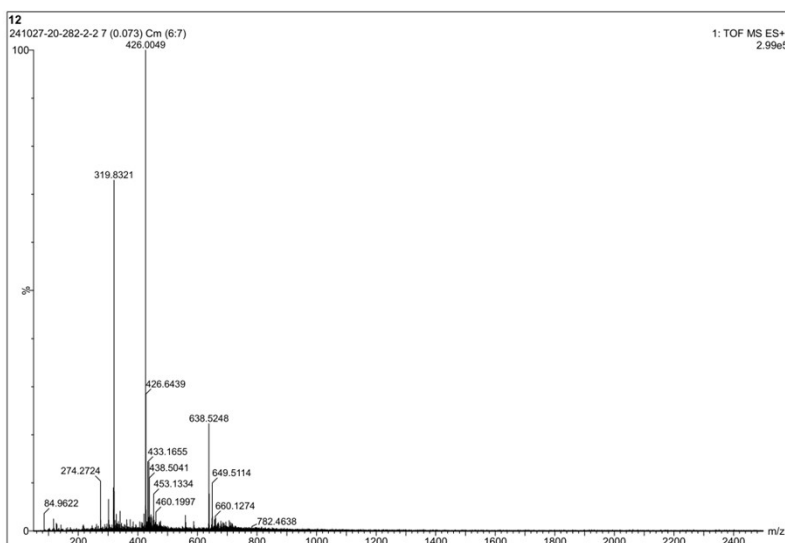

**Figure S6.** The ESI-MS spectrum of D-A4

### S.2.3. Mass spectrum information of A4-T1

For Linear A4-T1, the calculated ESI-MS  $m/z$  values are: 647.245 ( $[M+2H]^{2+}$ ), 431.83 ( $[M+3H]^{3+}$ ), and 324.1225 ( $[M+4H]^{4+}$ ). The observed values are: 647.0710 ( $[M+2H]^{2+}$ ), 431.6965 ( $[M+3H]^{3+}$ ), and 324.0839 ( $[M+4H]^{4+}$ ).

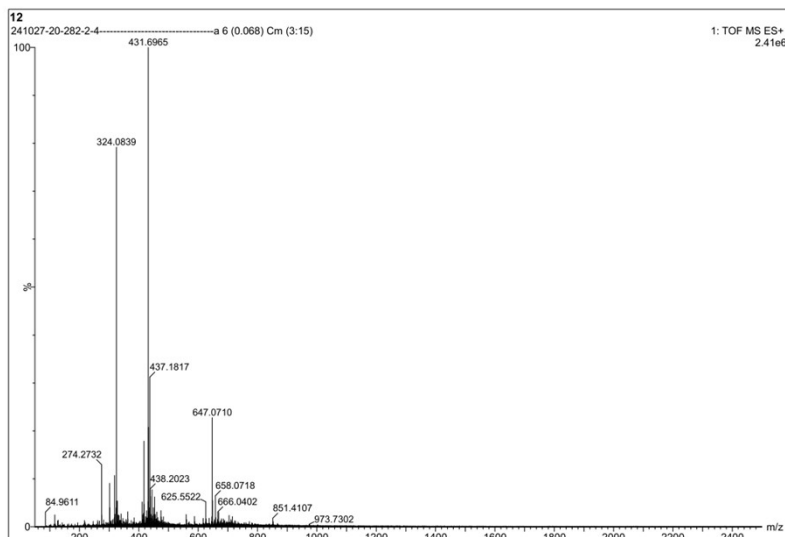

**Figure S7.** The ESI-MS spectrum of Linear A4-T1

For A4-T1, the calculated ESI-MS  $m/z$  values are: 647.245 ( $[M+2H]^{2+}$ ), 431.83 ( $[M+3H]^{3+}$ ), and 324.1225 ( $[M+4H]^{4+}$ ). The observed values are: 647.0701 ( $[M+2H]^{2+}$ ), 431.7180 ( $[M+3H]^{3+}$ ), and 324.0912 ( $[M+4H]^{4+}$ ).

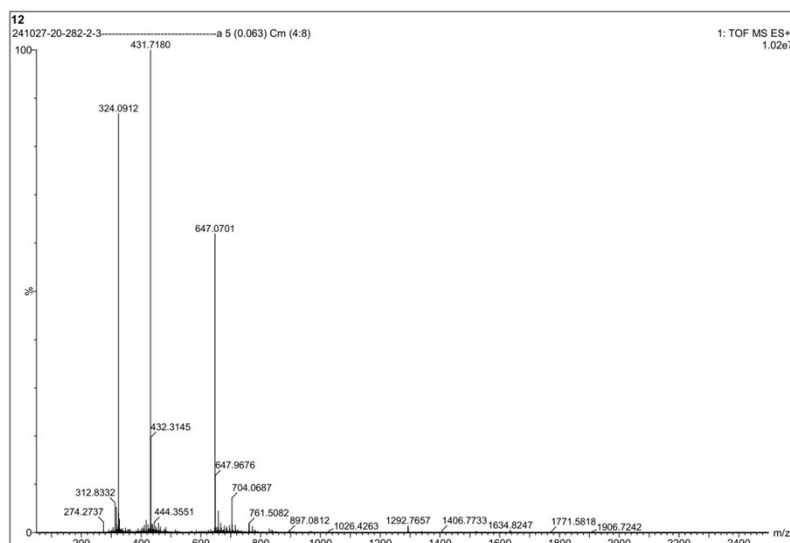

**Figure S8.** The ESI-MS spectrum of A4-T1

#### S.2.4. Mass spectrum information of A4-T2

For Linear A4-T2, the calculated ESI-MS  $m/z$  values are: 654.255 ( $[M+2H]^{2+}$ ), 436.5033 ( $[M+3H]^{3+}$ ), and 327.6275 ( $[M+4H]^{4+}$ ). The observed values are: 654.0773 ( $[M+2H]^{2+}$ ), 436.3814 ( $[M+3H]^{3+}$ ), and 327.5899 ( $[M+4H]^{4+}$ ).

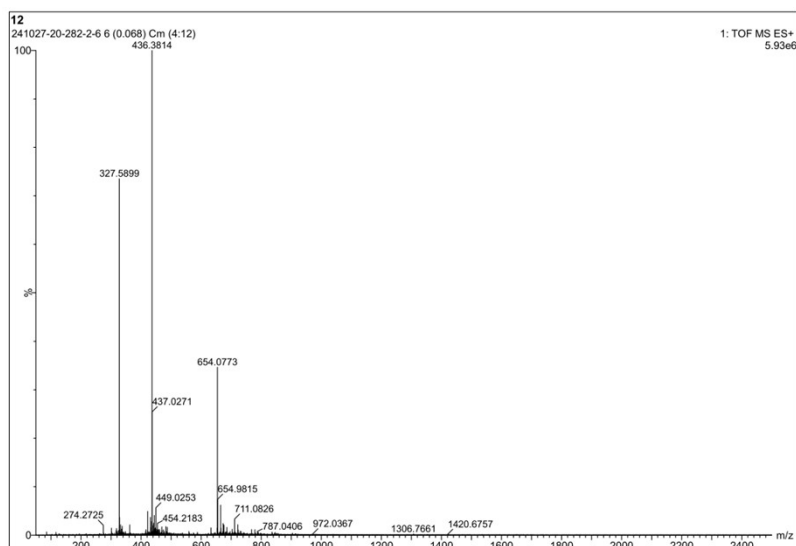

**Figure S9.** The ESI-MS spectrum of Linear A4-T2

For A4-T2, the calculated ESI-MS  $m/z$  values are: 654.255 ( $[M+2H]^{2+}$ ), 436.5033 ( $[M+3H]^{3+}$ ), and 327.6275 ( $[M+4H]^{4+}$ ). The observed values are: 654.0862 ( $[M+2H]^{2+}$ ), 436.3984 ( $[M+3H]^{3+}$ ), and 327.6061 ( $[M+4H]^{4+}$ ).

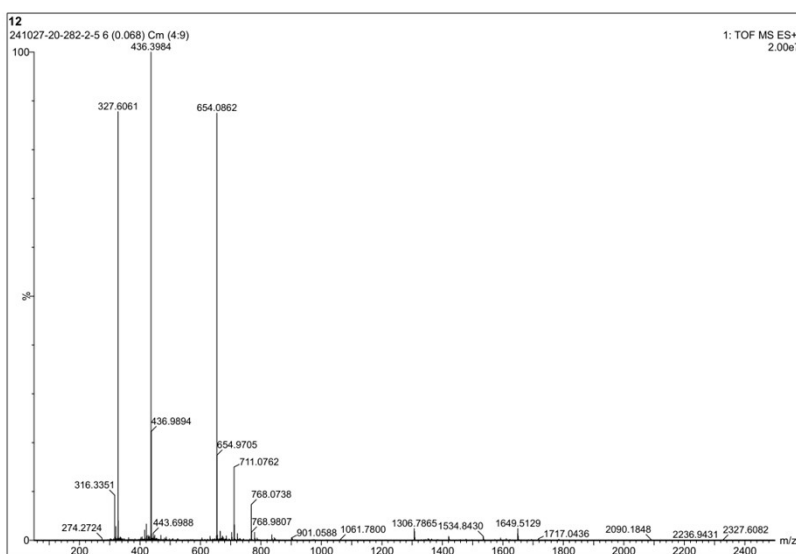

**Figure S10.** The ESI-MS spectrum of A4-T2

### S.2.5. Mass spectrum information of A4-T3

For Linear A4-T3, the calculated ESI-MS  $m/z$  values are: 661.27 ( $[M+2H]^{2+}$ ), 441.18 ( $[M+3H]^{3+}$ ), and 331.135 ( $[M+4H]^{4+}$ ). The observed values are: 661.0945 ( $[M+2H]^{2+}$ ), 441.0436 ( $[M+3H]^{3+}$ ), and 331.0896 ( $[M+4H]^{4+}$ ).

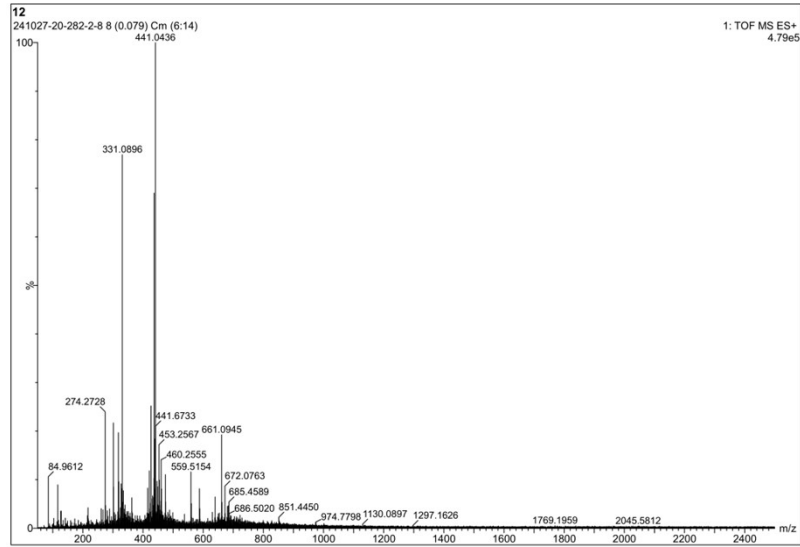

**Figure S11.** The ESI-MS spectrum of Linear A4-T3

For A4-T3, the calculated ESI-MS  $m/z$  values are: 661.27 ( $[M+2H]^{2+}$ ), 441.18 ( $[M+3H]^{3+}$ ), and 331.135 ( $[M+4H]^{4+}$ ). The observed values are: 661.0874 ( $[M+2H]^{2+}$ ), 441.0526 ( $[M+3H]^{3+}$ ), and 331.0941 ( $[M+4H]^{4+}$ ).

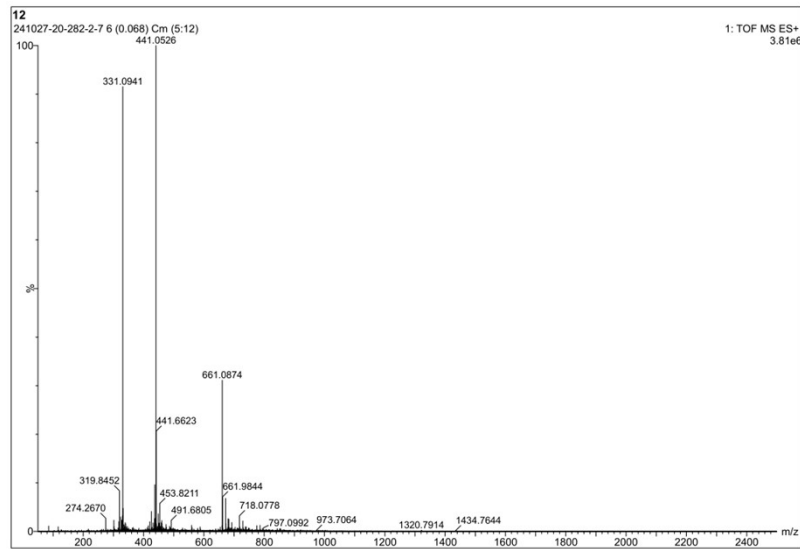

**Figure S12.** The ESI-MS spectrum of A4-T3

### S.3. Stability of A4 and its Derived Peptides

#### S.3.1. The original HPLC spectra of A4 under trypsin conditions

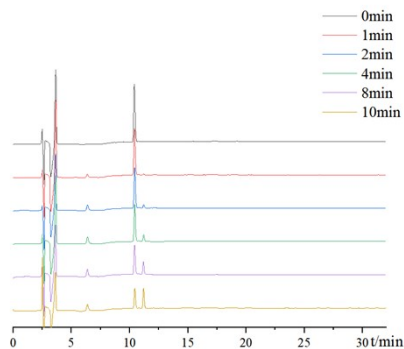

**Figure S13.** The HPLC spectra of A4 under trypsin conditions

*S.3.2. The original HPLC spectra of D-A4 under trypsin conditions*

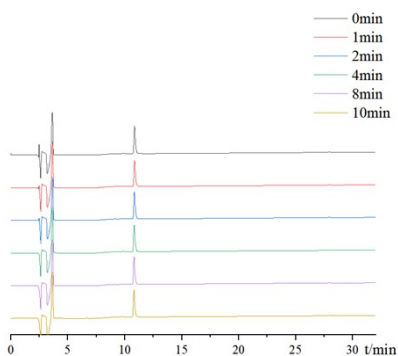

**Figure S14.** The HPLC spectra of D-A4 under trypsin conditions

*S.3.3. The original HPLC spectra of A4-T3 under trypsin conditions*

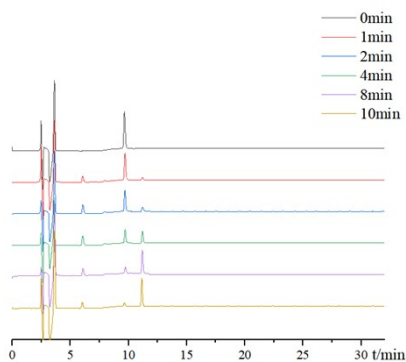

**Figure S15.** The HPLC spectra of A4-T3 under trypsin conditions
